# Supplementary material for: Facile metal-free reduction-based synthesis of pristine and cation-doped conductive mayenite
Source: PubMed Central journal article supplement — RSC Adv. 2018 Jul 4;8(43):24276–85. doi: 10.1039/c8ra02790k (PMC9082041; doi:10.1039/c8ra02790k), 2018-07-04
Supplement: RA-008-C8RA02790K-s001.pdf [file RA-008-C8RA02790K-s001.pdf]

## Facile metal free reduction based synthesis of pristine and cation doped conductive Mayenite

Karim Khan<sup>a\*</sup>, Ayesha Khan Tareen<sup>b</sup>, Sayed Elshahat<sup>a</sup>, Naseer Muhammad<sup>a</sup>, Jia Li<sup>b</sup>, Israa Aboodd<sup>a</sup>, Luigi Bibbò<sup>a</sup>, Ashish Yadav<sup>a</sup>, Rizwan Ur Rehman Sagar<sup>c</sup>, Usman Khan<sup>d</sup>, Zhengbiao Ouyang<sup>a\*</sup>

---

<sup>a</sup>College of Electronic Science and Technology, THz Technical Research Center, Key Laboratory of Optoelectronics Devices and Systems of Ministry of Education and Guangdong Province, Shenzhen University, Shenzhen 518060.

<sup>b</sup>Ningbo Institute of Material Technology and Engineering, Chinese Academy of Sciences, Ningbo, 315201, P. R. China.

<sup>c</sup>College of Materials Science and Engineering & College of Optoelectronic Engineering, Shenzhen University 518060, P. R. China.

<sup>d</sup>Low dimensional materials and devices laboratory, Tsinghua-Berkeley Shenzhen institute, Tsinghua University Shenzhen, 518055, PR China.

Corresponding Authors: \*zbouyang@szu.edu.cn (Zhengbiao Ouyang), \*karim\_khan\_niazi@yahoo.com (Karim Khan).

---

### 1. Scanning Electron Microscopy (SEM) data of $C_{12}A_{7-x}V_x:e^-$

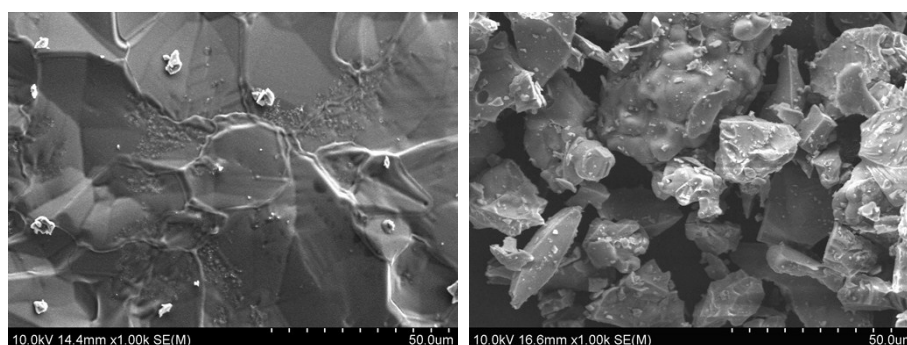

Fig. S1: SEM graph of  $C_{12}A_{7-x}V_x:e^-$  where  $x = 1$ , sample heat treated at 1550 °C in  $N_2$ - atmosphere.
